# Supplementary material for: Gene expression and metabolite profiling of gibberellin biosynthesis during induction of somatic embryogenesis in Medicago truncatula Gaertn
Source: PubMed Central journal article supplement (PMC5531487; doi:10.1371/journal.pone.0182055), 2017-07-27
Supplement: pone.0182055.s001.pdf [file pone.0182055.s001.pdf]

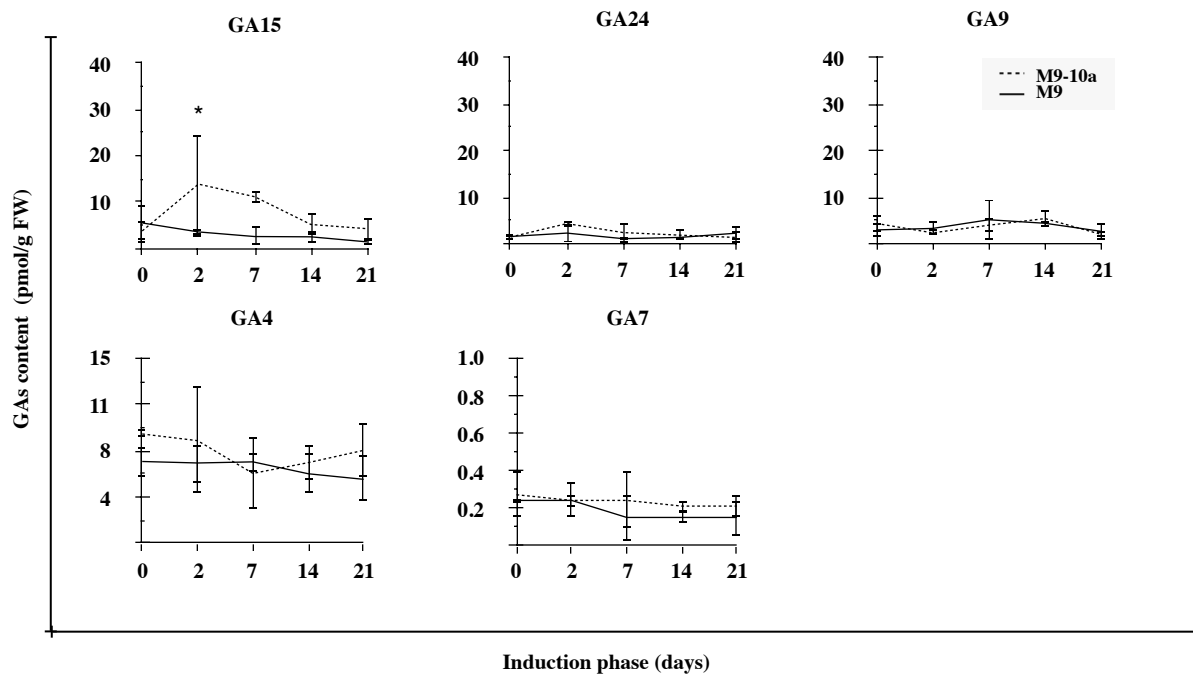

**S1 Fig.**

**Changes in gibberellin content.** Changes in endogenous levels of non-13-hydroxy gibberellin metabolites during the induction phase in *Medicago truncatula* non-embryogenic genotype (M9) and variant with embryogenic phenotype (M9-10a). Two-way ANOVA with 0.05 confidence interval and Sidak post-hoc test; significance between groups indicated with \* for  $P \leq 0.05$ , \*\*\* for  $P \leq 0.001$  and \*\*\*\* for  $P \leq 0.0001$ . Bars indicate  $\pm$  SD ( $n = 3$ ).
