# Supplementary material for: Gene expression and metabolite profiling of gibberellin biosynthesis during induction of somatic embryogenesis in Medicago truncatula Gaertn
Source: PubMed Central journal article supplement (PMC5531487; doi:10.1371/journal.pone.0182055), 2017-07-27

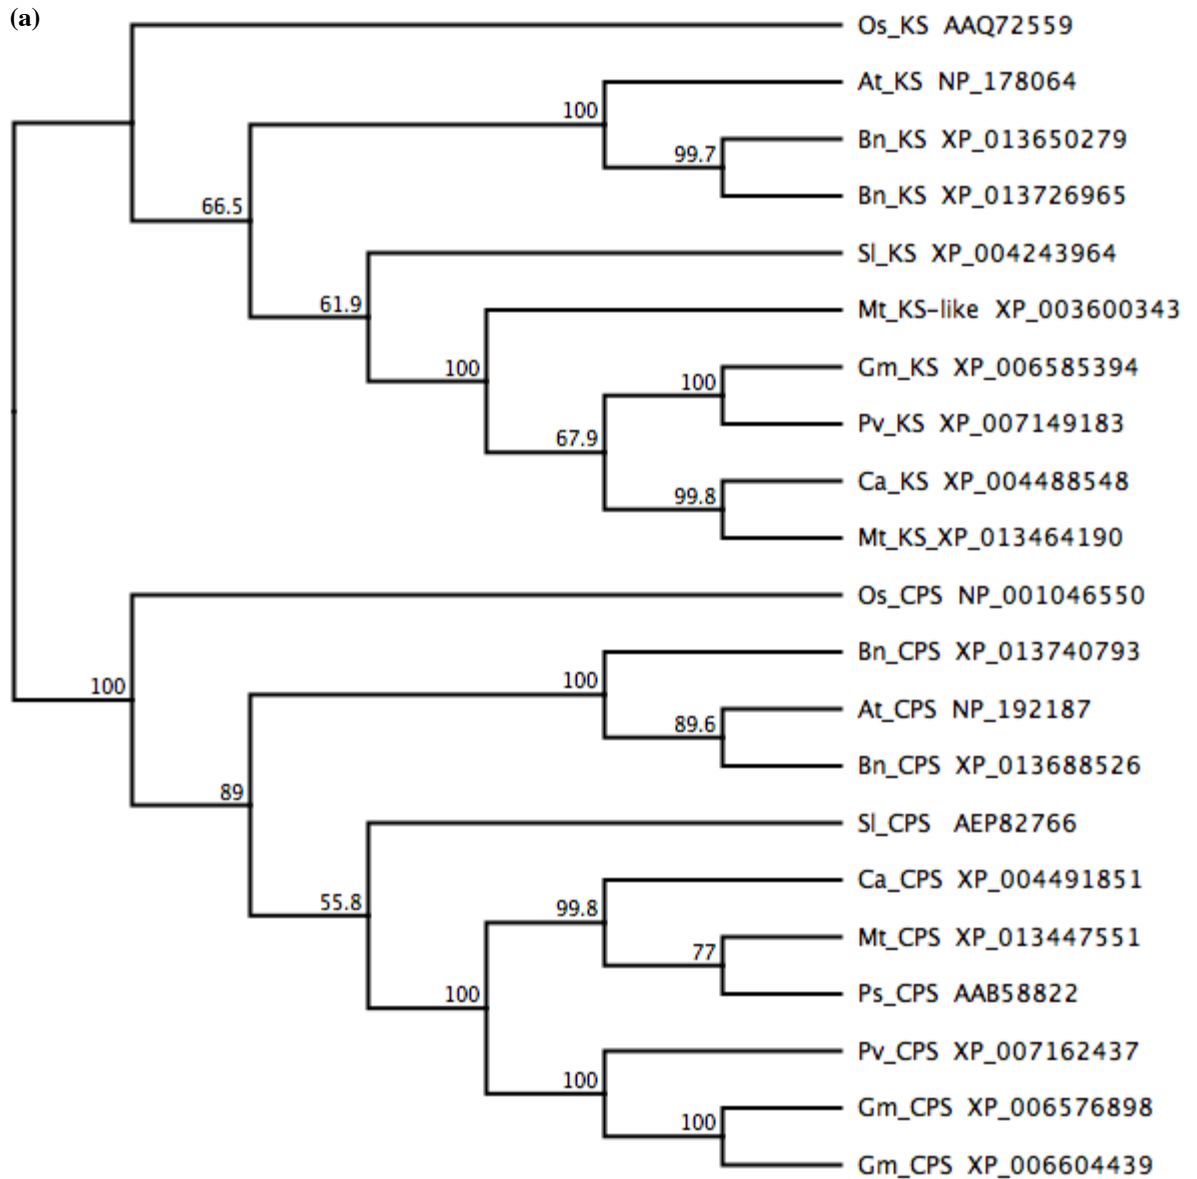

**S2 Fig.**

**Phylogenetic relationships between amino acid sequences of gibberellin biosynthesis enzymes.**

Phylogenetic tree generated from protein sequences of (a) - CPS (ent-copalyl diphosphate synthase) and KS (ent-kaurene synthase), (b) - KO (ent-kaurene oxidase), (c) - KAO (ent-kaurenoic acid oxidase) and beta-amyrin 11-oxidase, (d) - CYP714 (Cytochrome 450 family, known also as Gibberellin 13-oxidases, GA13ox), (e) - GA20ox (gibberellin 20-oxidase) and GA3ox (gibberellin 3-oxidase), (f) - GA3ox (gibberellin 3-oxidase) representing phylogenetic relationships between plant taxa. Taxa terminologies are abbreviated using the first letter of the genus and first letter of the species name: At – *Arabidopsis thaliana*, Bn – *Brassica napus*, Ca – *Cicer arietinum*, Gm – *Glycine max*, Mt – *Medicago truncatula*, Os - *Oryza sativa*, Ps - *Pisum sativum*, Pv – *Phaseolus vulgaris*, Sl – *Solanum lycopersicum*. Phylogenetic analysis was performed using Geneious 6.1 software with Neighbor-Joining tree building method and Jukes-Cantor genetic distance model. Trees were resampled 1000 times using bootstrap method.

(b)

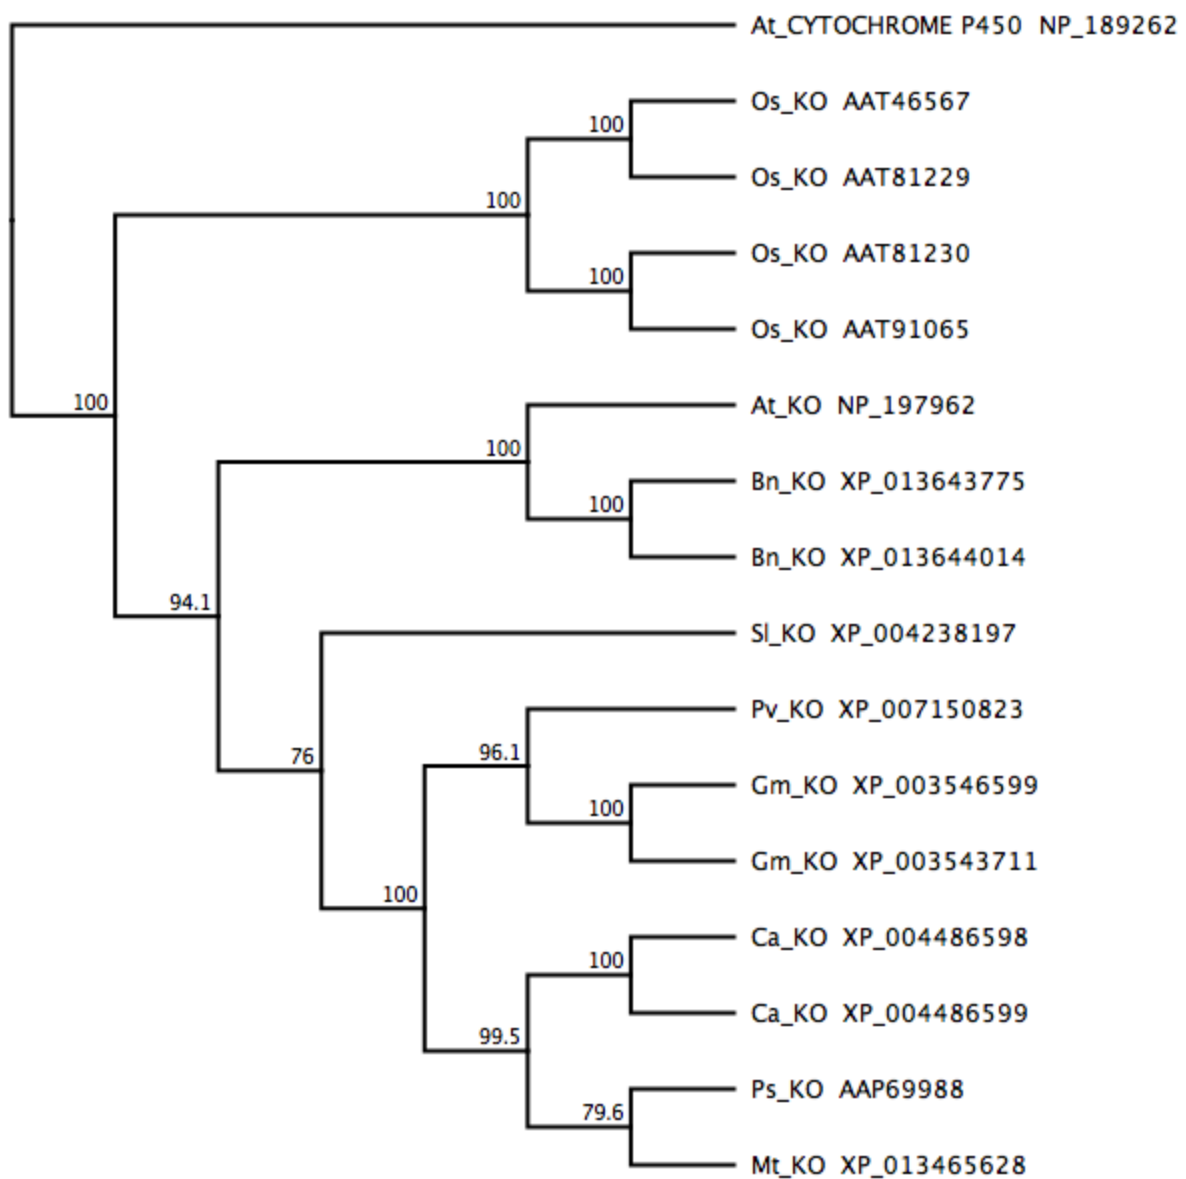

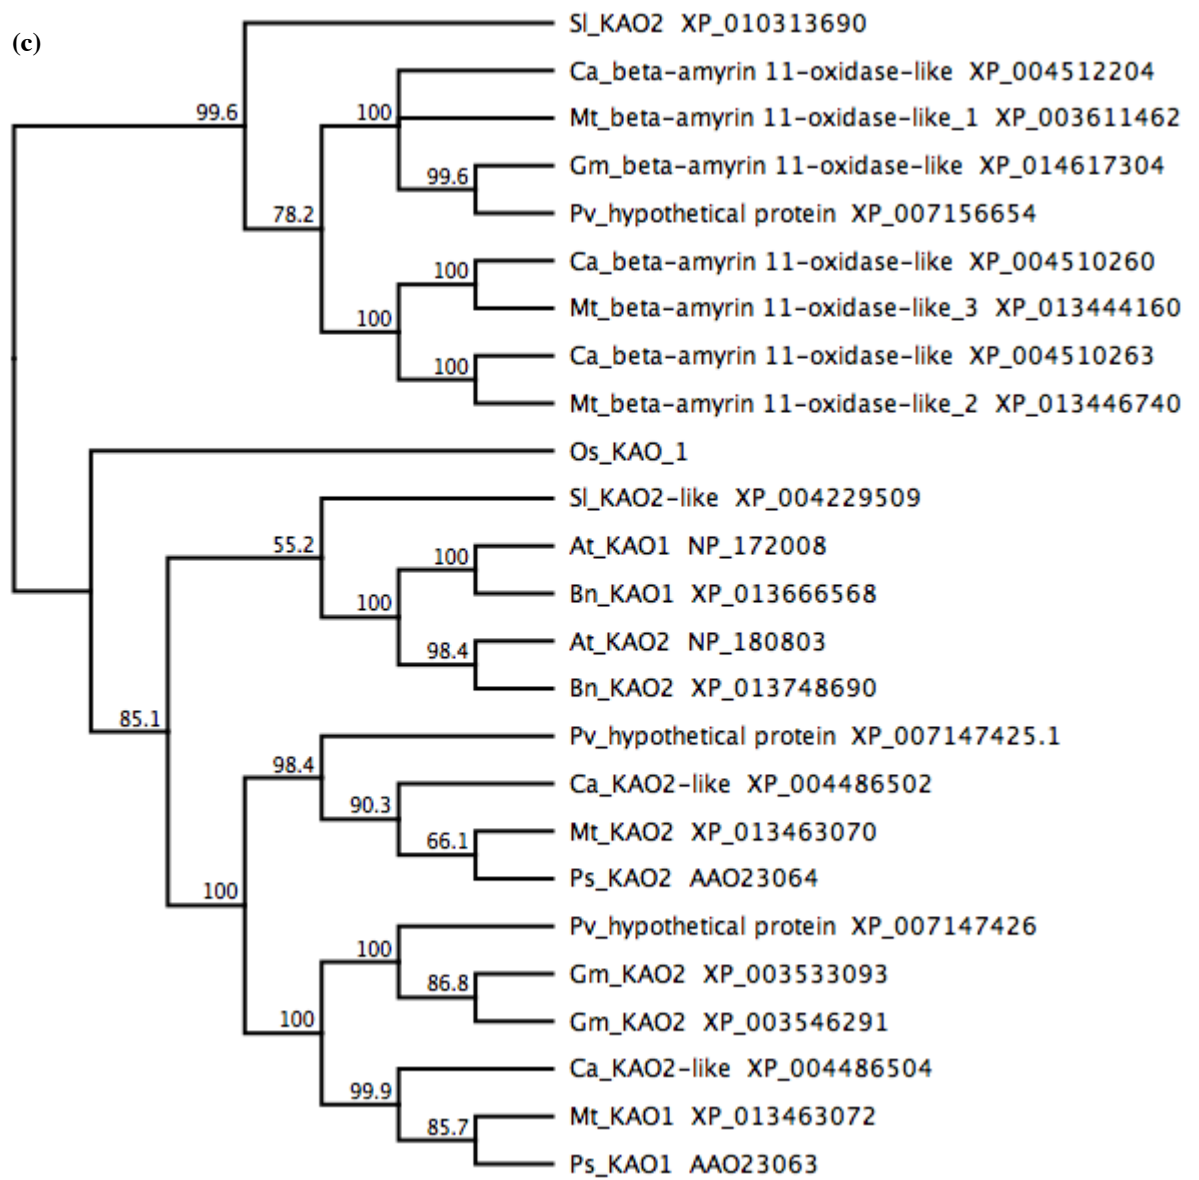

(d)

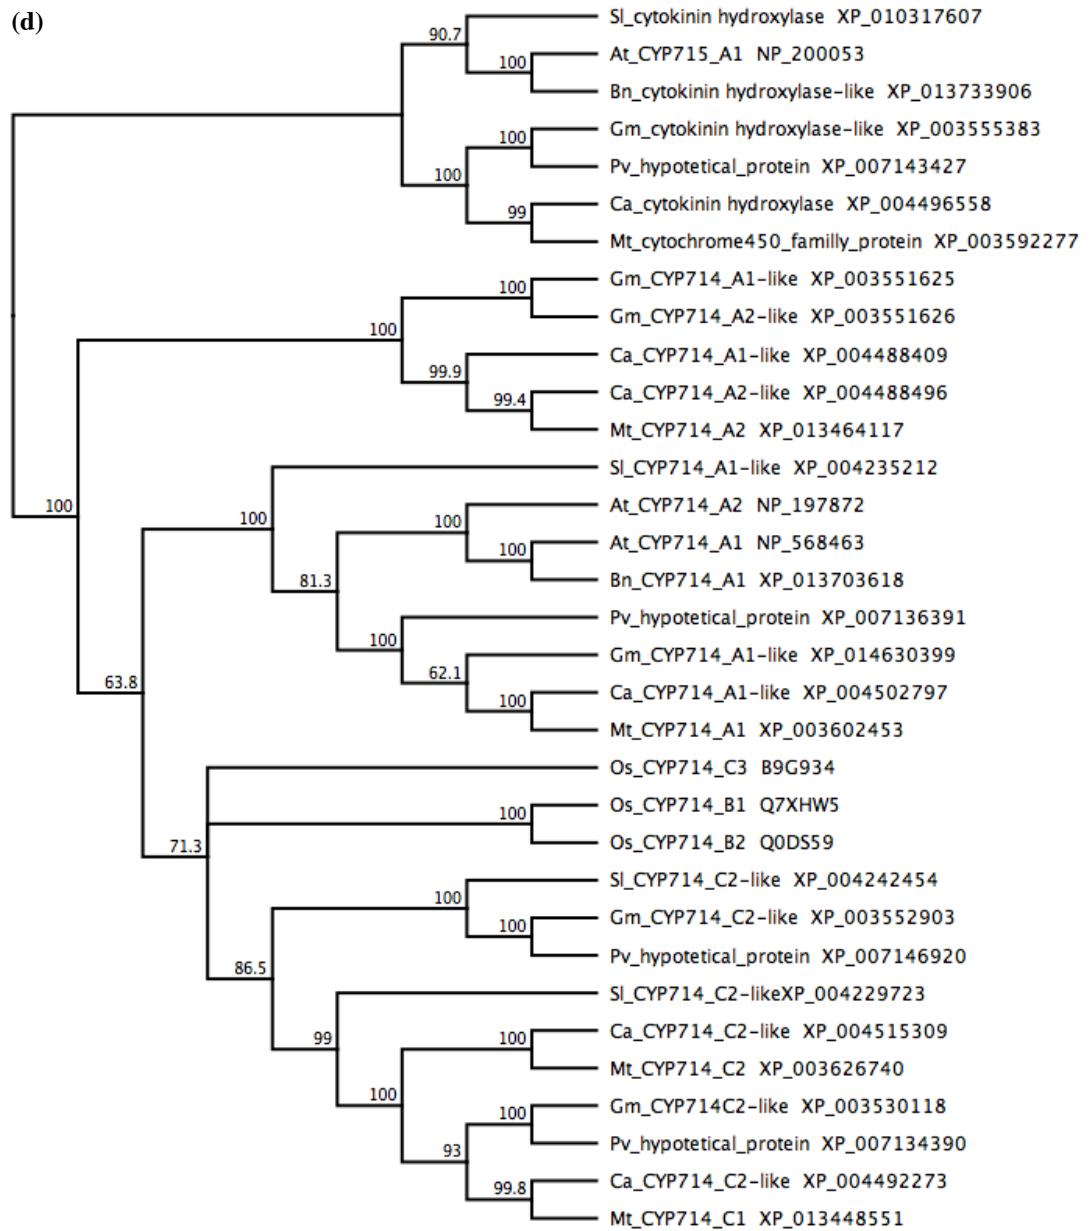

(e)

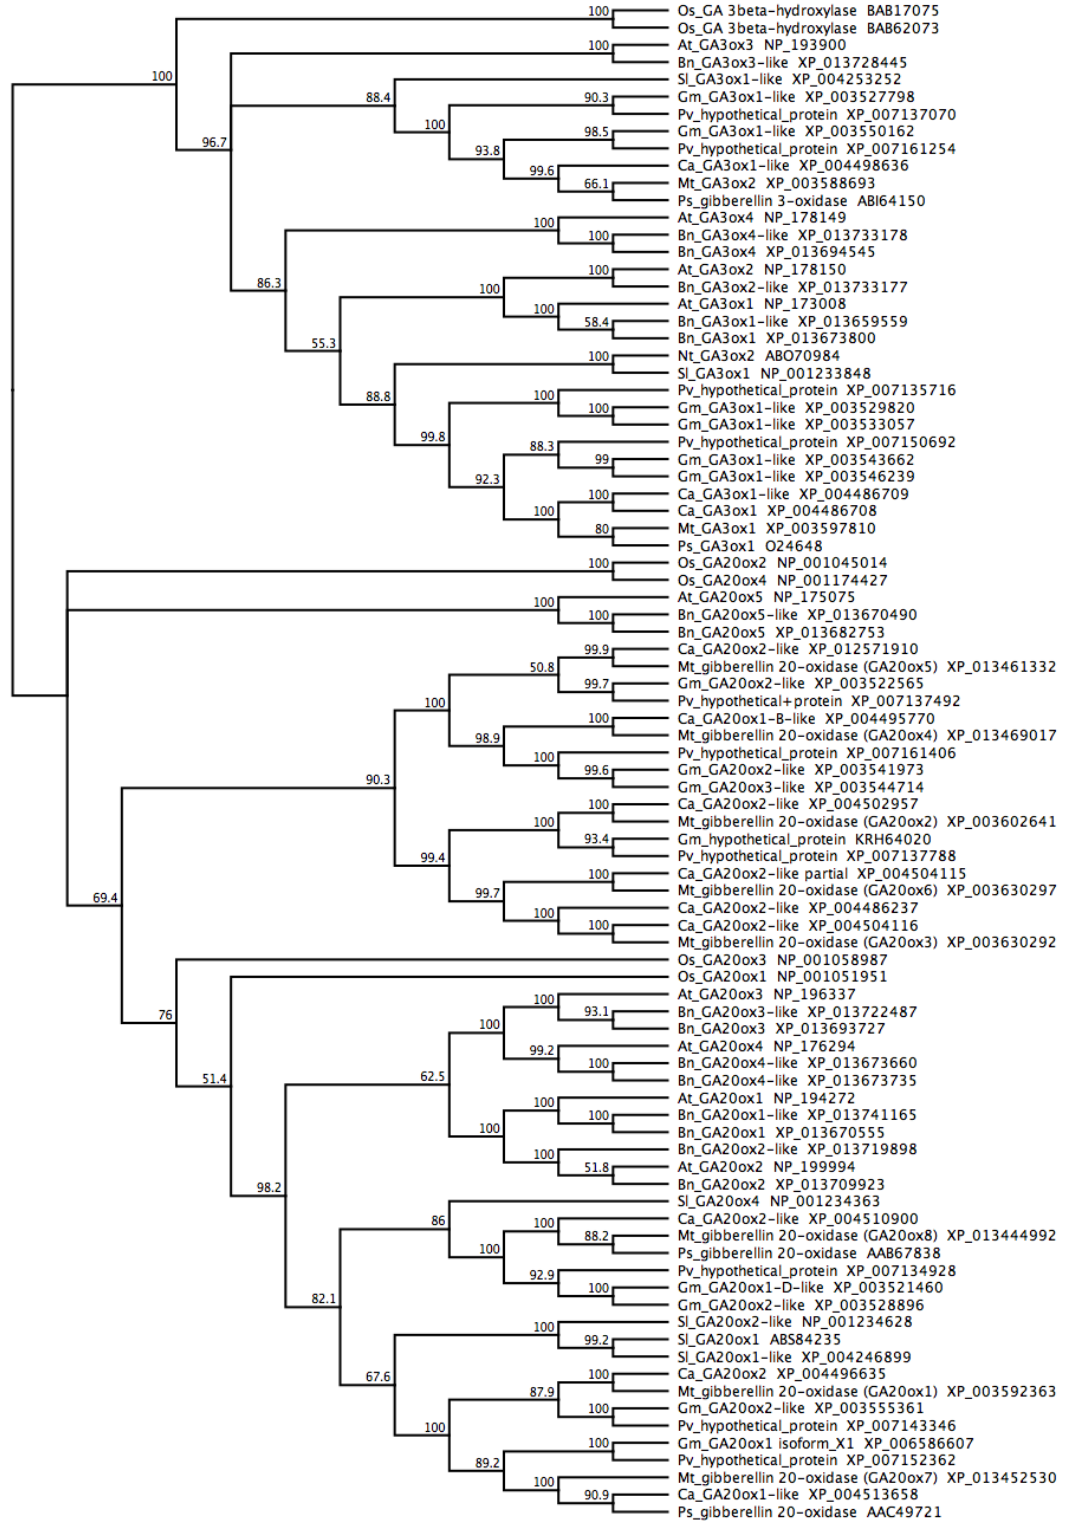

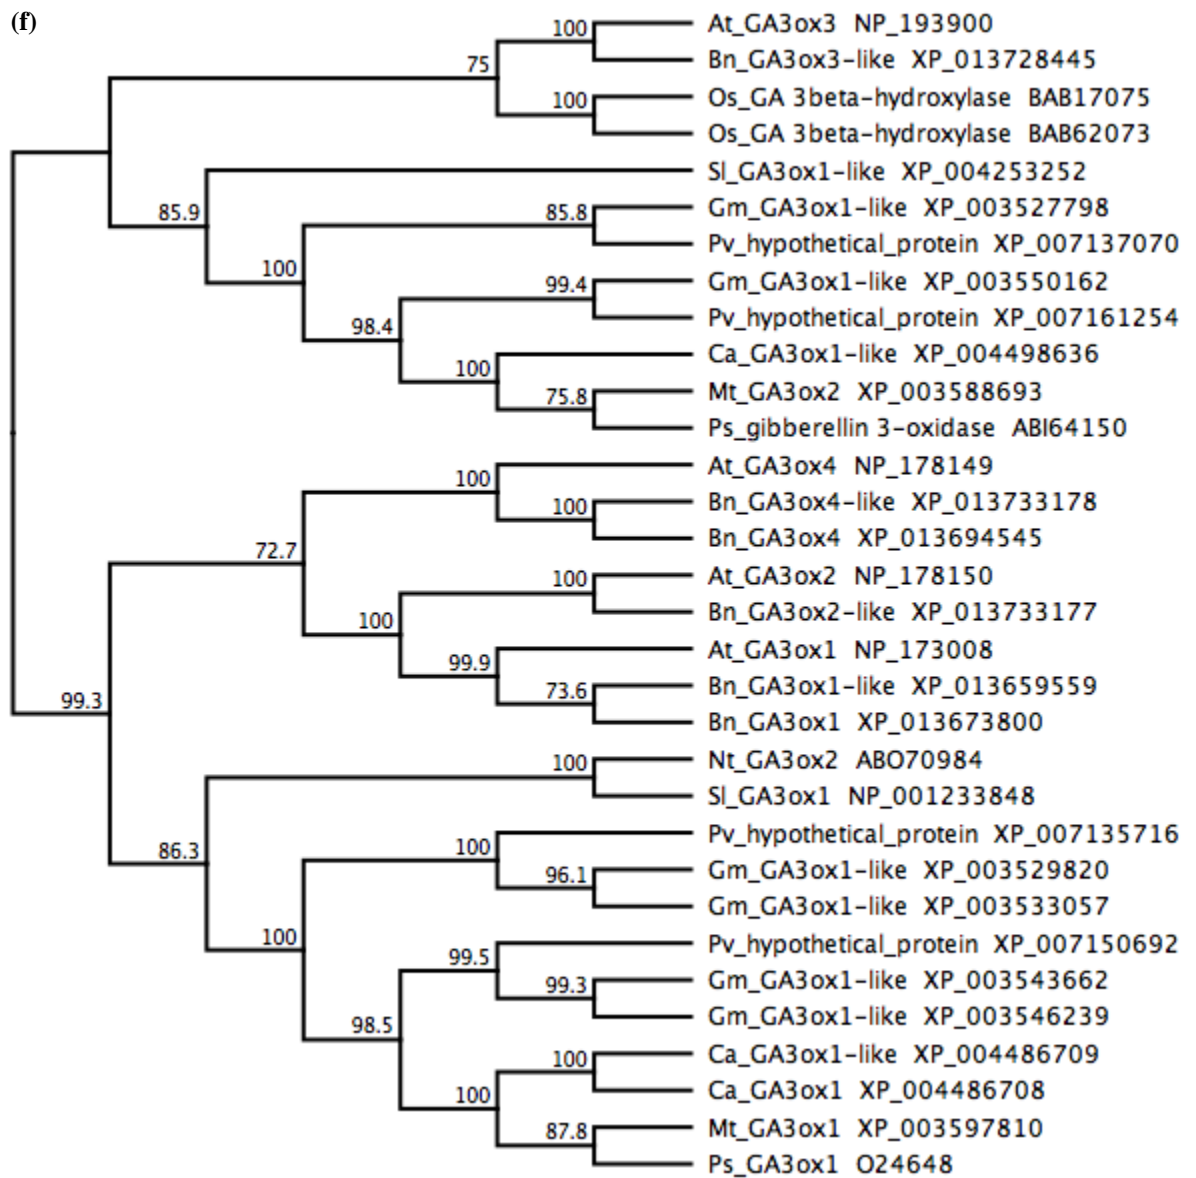

Supplement: pone.0182055.s002.pdf [file pone.0182055.s002.pdf]
