# Supplementary material for: Gene expression and metabolite profiling of gibberellin biosynthesis during induction of somatic embryogenesis in Medicago truncatula Gaertn
Source: PubMed Central journal article supplement (PMC5531487; doi:10.1371/journal.pone.0182055), 2017-07-27
Supplement: pone.0182055.s003.pdf [file pone.0182055.s003.pdf]

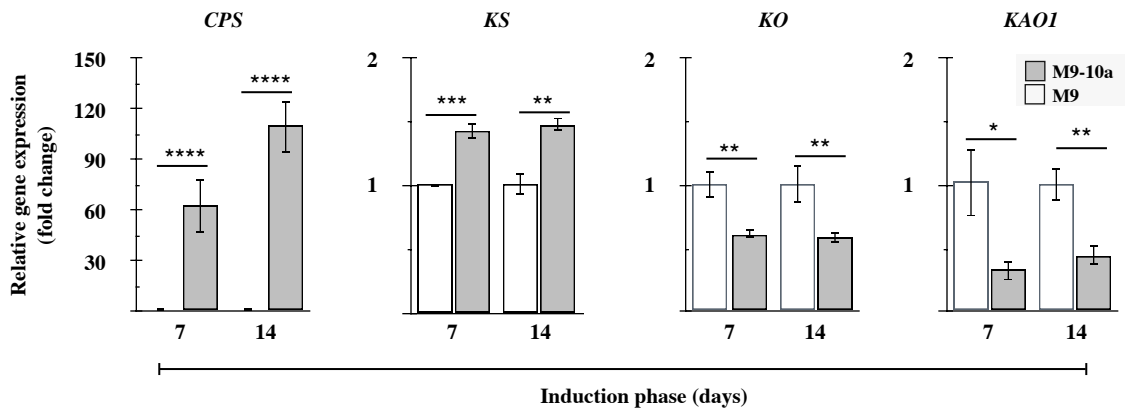

**S3 Fig.**

**Relative gene expression of genes coding enzymes in early steps of gibberellin biosynthesis.** Relative gene expression of *Medicago truncatula* *CPS* (*ent-copalyl diphosphate synthase*), *KS* (*ent-kaurene synthase*), *KO* (*ent-kaurene oxidase*), *KAO* (*ent-kaurenoic acid oxidase*) measured after first and second week of induction presented as a multiplication factor change in embryogenic variant (M9-10a) relative to non-embryogenic genotype (M9) set to 1. Statistical analyses were performed as two-tailed t-test with 0.05 confidence interval. Asterisks represent significance levels: \* -  $P \leq 0.05$ , \*\* -  $P \leq 0.01$ , \*\*\* -  $P \leq 0.001$  and \*\*\*\* -  $P \leq 0.0001$ . Bars indicate +/- SD (n = 3).
