# Supplementary material for: Gene expression and metabolite profiling of gibberellin biosynthesis during induction of somatic embryogenesis in Medicago truncatula Gaertn
Source: PubMed Central journal article supplement (PMC5531487; doi:10.1371/journal.pone.0182055), 2017-07-27
Supplement: pone.0182055.s005.pdf [file pone.0182055.s005.pdf]

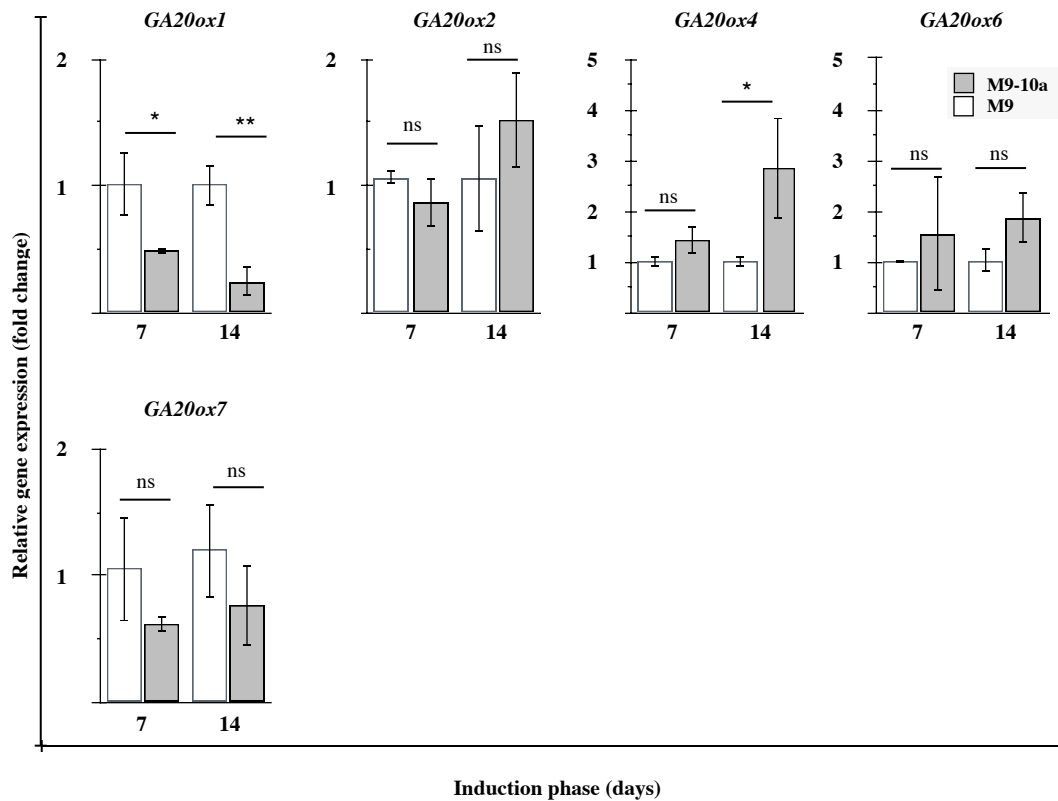

**S5 Fig.**

**Relative gene expression of genes coding *GA20oxidases* in late steps of gibberellin biosynthesis.**

Expression of *Medicago truncatula* *GA20ox* (*Gibberellin 20-oxidase*) genes measured after first and second week of induction presented as a multiplication factor change in embryogenic variant (M9-10a) relative to non-embryogenic genotype (M9) set to 1. Statistical analyses were performed as two-tailed t-test with 0.05 confidence interval. Asterisks represent significance levels: \* -  $P \leq 0.05$ , \*\* -  $P \leq 0.001$  and ns for non-significant differences. Bars indicate +/- SD (n = 3).
